# Supplementary material for: Aggregation behaviours and bactericidal activities of novel cationic surfactants functionalized with amides and ether groups
Source: Royal Society of Chemistry journal article supplement (doi:10.1039/c4ra14645j), 2015-01-01
Supplement: c4ra14645j1.pdf [file c4ra14645j1.pdf]

## **Supporting information**

### **Aggregation Behavior and Bactericidal Activities of Novel Cationic Surfactants Functionalized with Amides and Ether Groups**

Guangzhou Cao, Xiangfeng Guo\*, Lihua Jia\*, Xuhua Tian

College of Chemistry and Chemical Engineering, Key Laboratory of Fine Chemicals  
of College of Heilongjiang Province, Qiqihar University, Qiqihar 161006, China.

\*Corresponding author. Email: xfguo@163.com (X. Guo); jlh29@163.com (L. Jia).

## Synthesis and Characterization

### Synthesis of ethyl phenoxyacetate (1)

Phenol (15.0 g, 160 mmol), ethyl chloroacetate (39.7 g, 324 mmol) and anhydrous  $K_2CO_3$  (46.3 g, 336 mmol) were added in 100 mL of dry acetonitrile, and refluxed for 1 h. After filtration, the solvent was evaporated under reduced pressure. Then the residue was separated by column chromatography using the mixture of petroleum ether/dichloromethane (2:1 by volume) as eluent, and then compound **1** as a gummy liquid (25.6 g, 88 % yield) was obtained.

FT-IR(KBr pellet)  $\nu$   $cm^{-1}$ : 2978(-CH<sub>3</sub>), 1760(C=O, ester), 1086(Ar-O-R, ether), 886-694(C-H, aromatic hydrocarbon); <sup>1</sup>H NMR (600 MHz, CDCl<sub>3</sub>)  $\delta$  ppm 6.90-7.28 (m, 5H, C<sub>6</sub>H<sub>5</sub>OCH<sub>2</sub>), 4.61 (s, 2H, C<sub>6</sub>H<sub>5</sub>OCH<sub>2</sub>COOCH<sub>2</sub>CH<sub>3</sub>), 4.24-4.28 (m, 2H, C<sub>6</sub>H<sub>5</sub>OCH<sub>2</sub>COOCH<sub>2</sub>CH<sub>3</sub>), 1.28 (t,  $J = 7.2$  Hz, 3H, C<sub>6</sub>H<sub>5</sub>OCH<sub>2</sub>COOCH<sub>2</sub>CH<sub>3</sub>).

### Synthesis of *N'*-(2-phenoxyacetyl)-*N,N*-dimethylethylenediamine (2)

Compound **1** (16.8 g, 93.4 mmol) and *N,N*-Dimethylethylene-diamine (10.1 g, 114.9 mmol) were dissolved in 60 mL ethanol, refluxed for 5 h. After evaporation of the solvent, distilled water (20 mL) was added to the mixture, and the pH of the mixture was adjusted to 8 by 6 mol L<sup>-1</sup> HCl solution. The mixed solution was then extracted with 3×20 mL dichloromethane. The organic layers were collected, dried over anhydrous magnesium sulfate, and concentrated under reduced pressure to give compound **2** as a yellow liquid (15.4 g, yield 74 %).

FT-IR (KBr pellet)  $\nu$   $cm^{-1}$ : 3264(N-H, amide), 2945(-CH<sub>3</sub>), 2814(-CH<sub>2</sub>-), 1654(C=O, amide), 1053(Ar-O-R, ether), 886-699(C-H, aromatic hydrocarbon); <sup>1</sup>H NMR (600

MHz, CDCl<sub>3</sub>):  $\delta$  ppm 6.94-7.33 (m, 5H, C<sub>6</sub>H<sub>5</sub>OCH<sub>2</sub>), 7.02 (t,  $J = 5.2$  Hz, 1H, CH<sub>2</sub>CONHCH<sub>2</sub>CH<sub>2</sub>), 4.50 (s, 2H, CH<sub>2</sub>CONHCH<sub>2</sub>CH<sub>2</sub>), 3.40-3.43 (m, 2H, CH<sub>2</sub>CONHCH<sub>2</sub>CH<sub>2</sub>), 2.45 (t,  $J = 6.0$  Hz, 2H, CH<sub>2</sub>CONHCH<sub>2</sub>CH<sub>2</sub>), 2.23 (s, 6H, CONHCH<sub>2</sub>CH<sub>2</sub>NCH<sub>3</sub>).

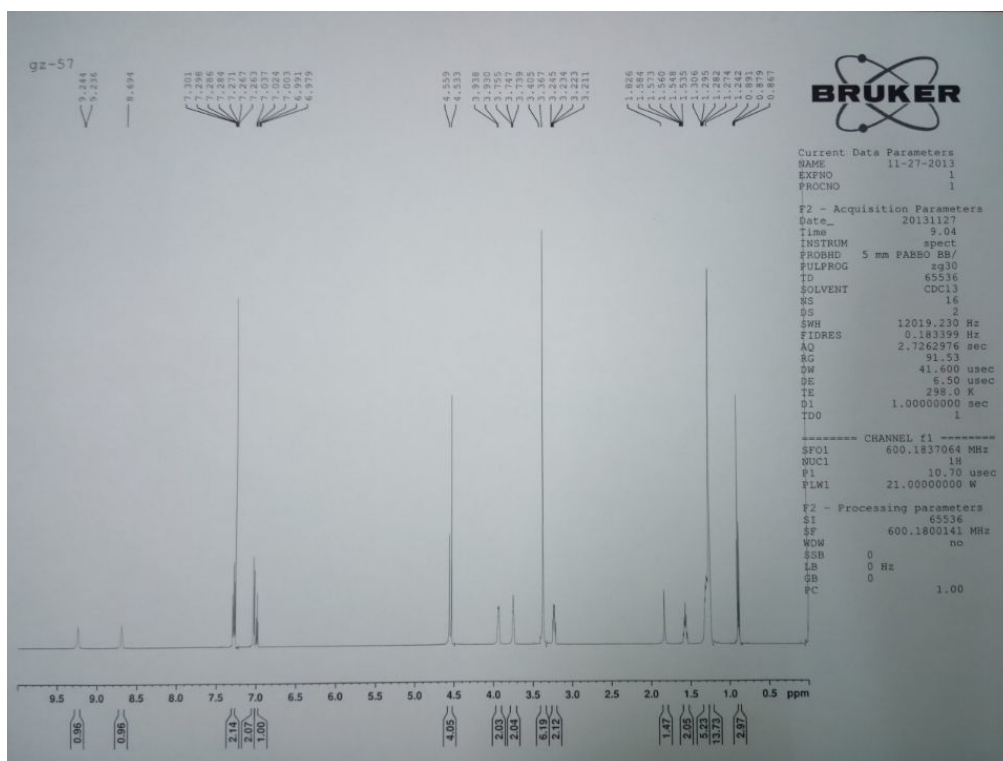

Figure 1 <sup>1</sup>H NMR and <sup>13</sup>C NMR of C<sub>12</sub>PDA

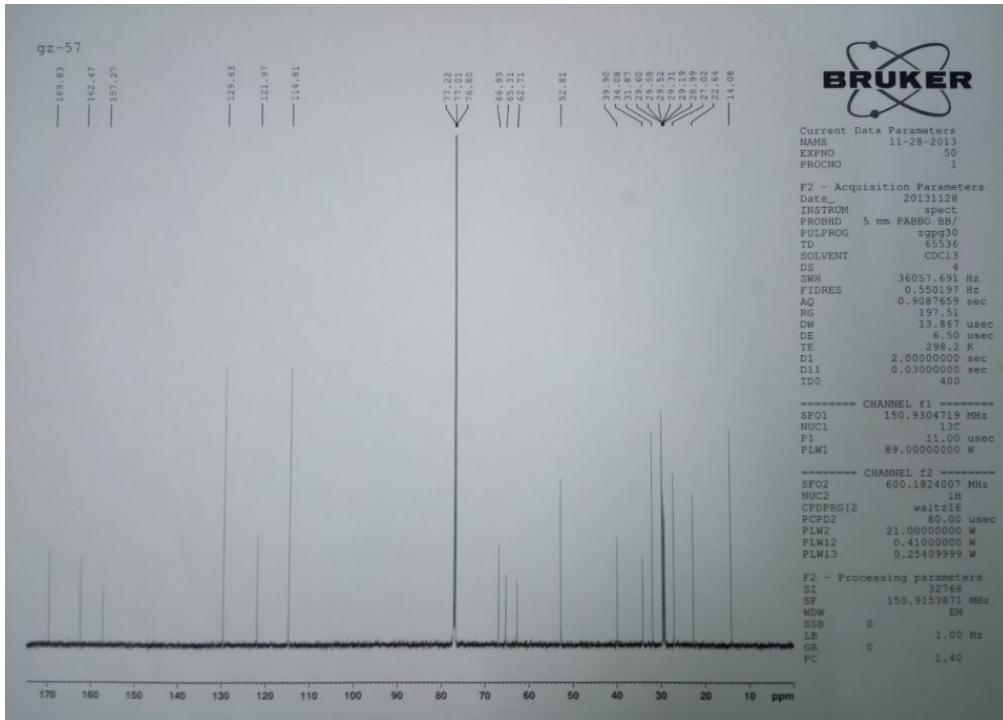

Figure 2  $^{13}\text{C}$  NMR of  $\text{C}_{12}\text{PDA}$

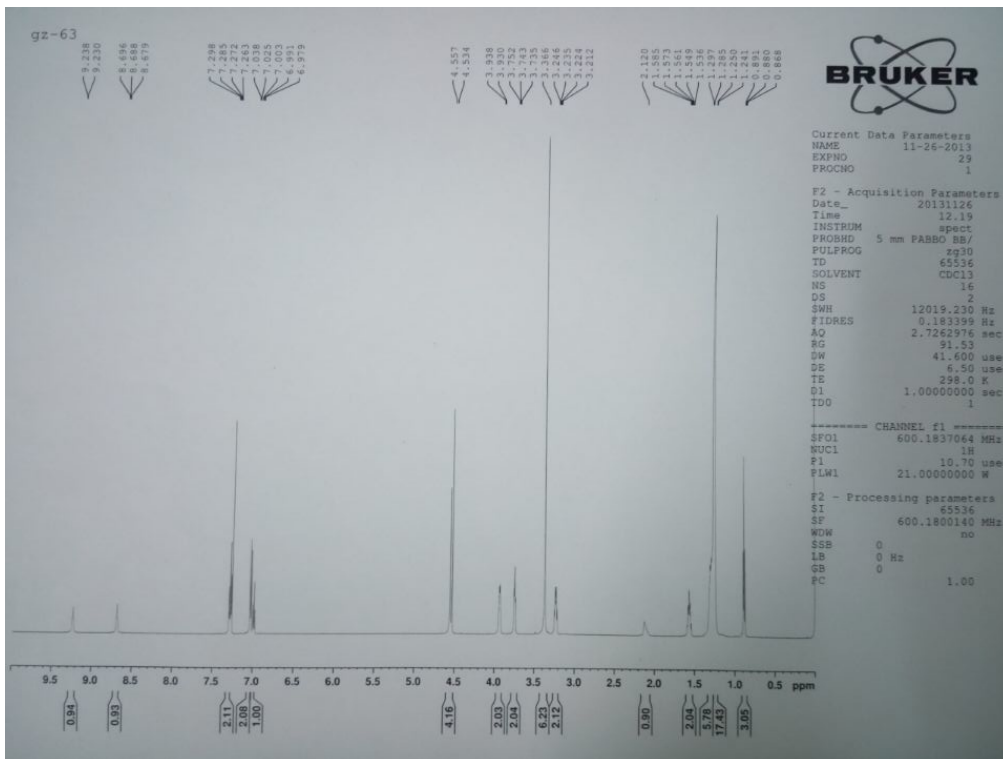

Figure 3  $^1\text{H}$  NMR of  $\text{C}_{14}\text{PDA}$

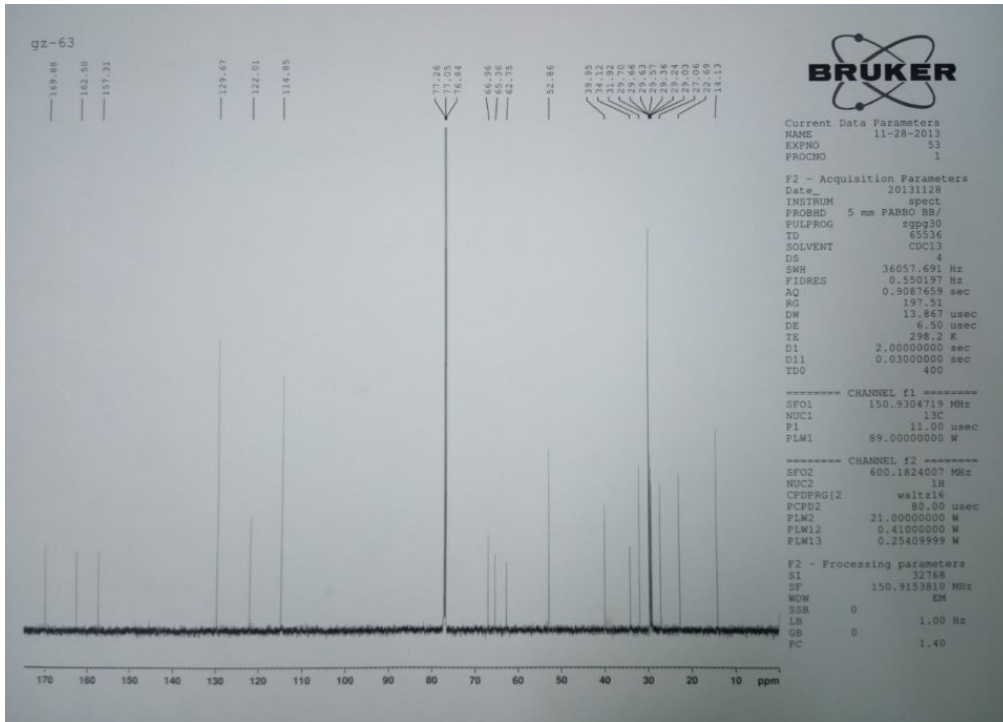

Figure 4  $^{13}\text{C}$  NMR of  $\text{C}_{14}\text{PDA}$

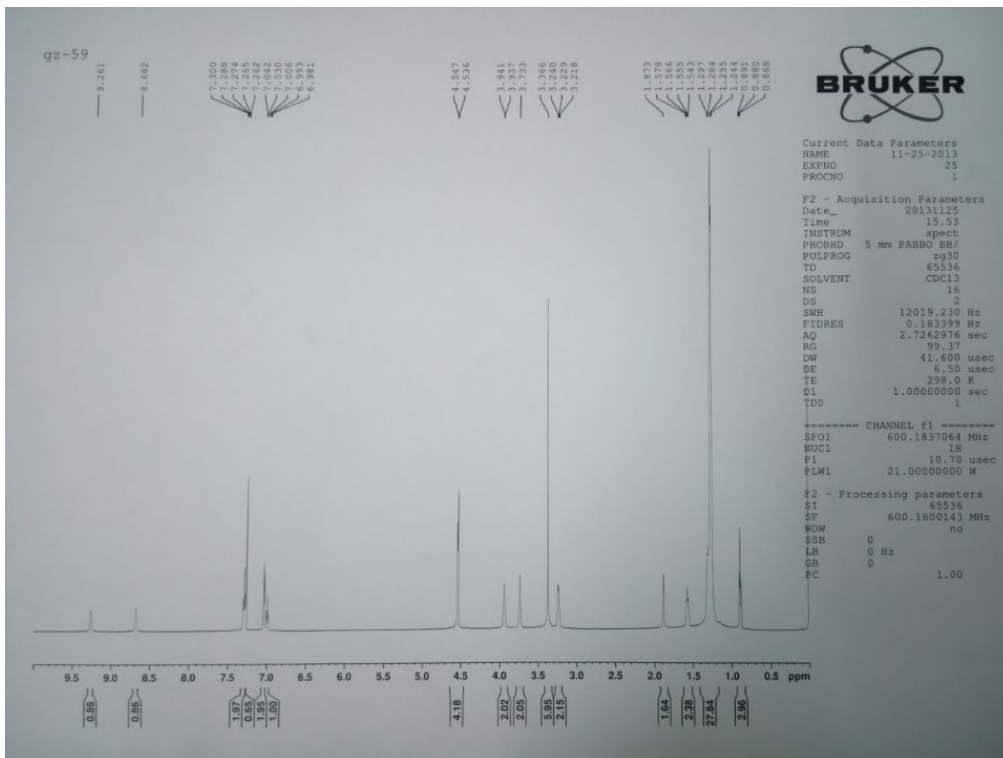

Figure 5  $^1\text{H}$  NMR of  $\text{C}_{16}\text{PDA}$

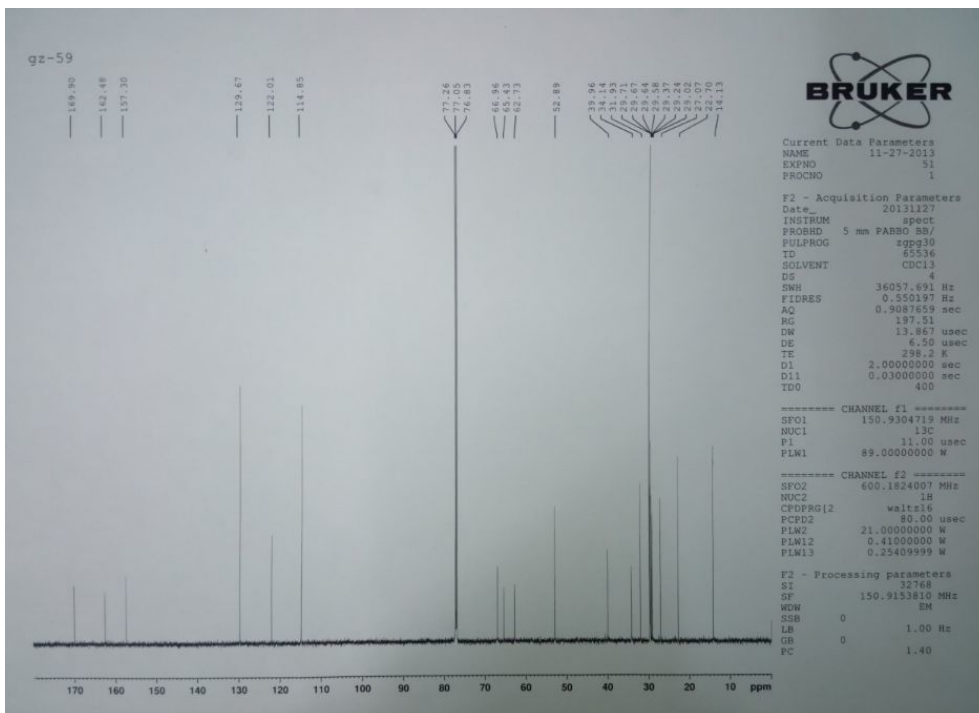

Figure 6  $^{13}\text{C}$  NMR of  $\text{C}_{16}\text{PDA}$

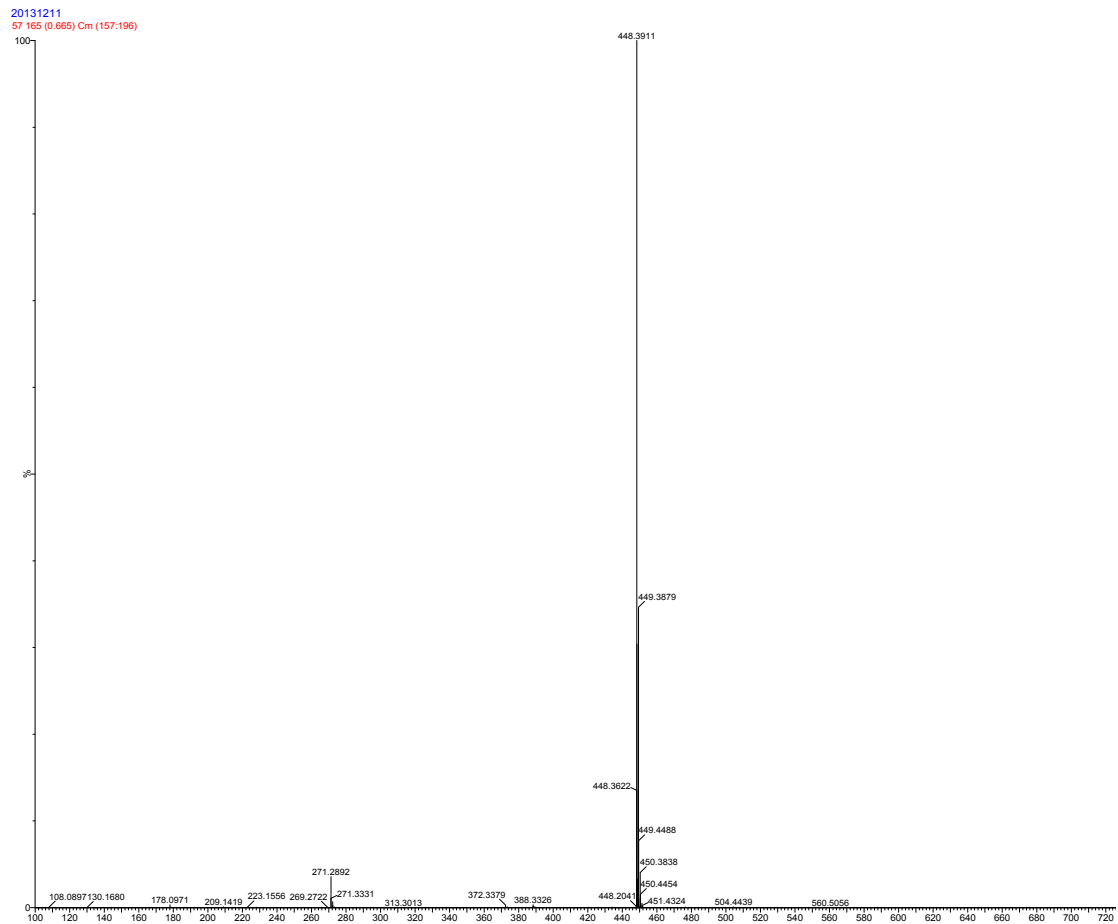

Figure 7 MS of C<sub>12</sub>PDA

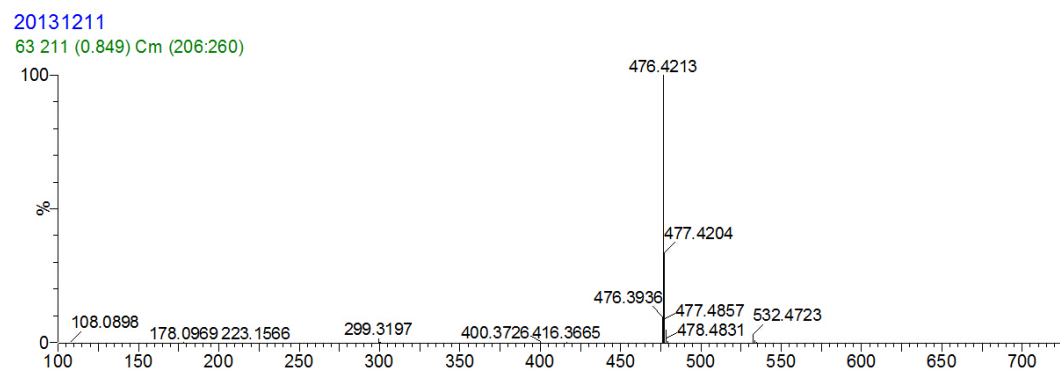

Figure 8 MS of C<sub>14</sub>PDA

20131211

59 277 (1.105) Cm (264:345)

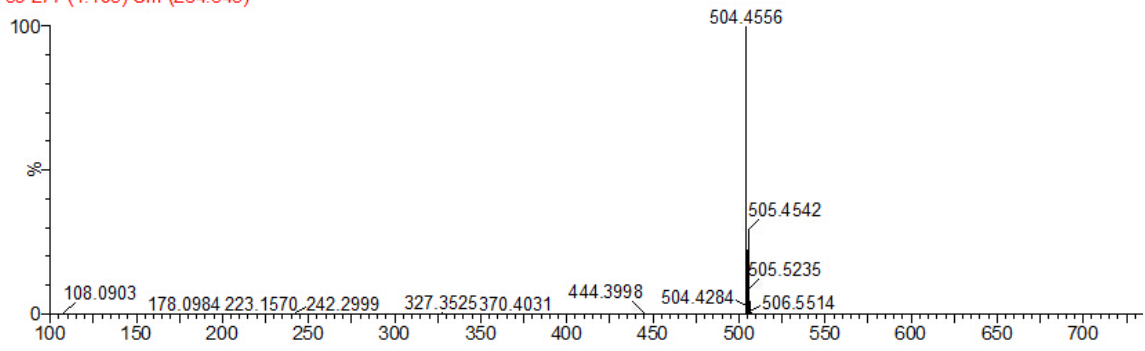

Figure 9 MS of C<sub>16</sub>PDA

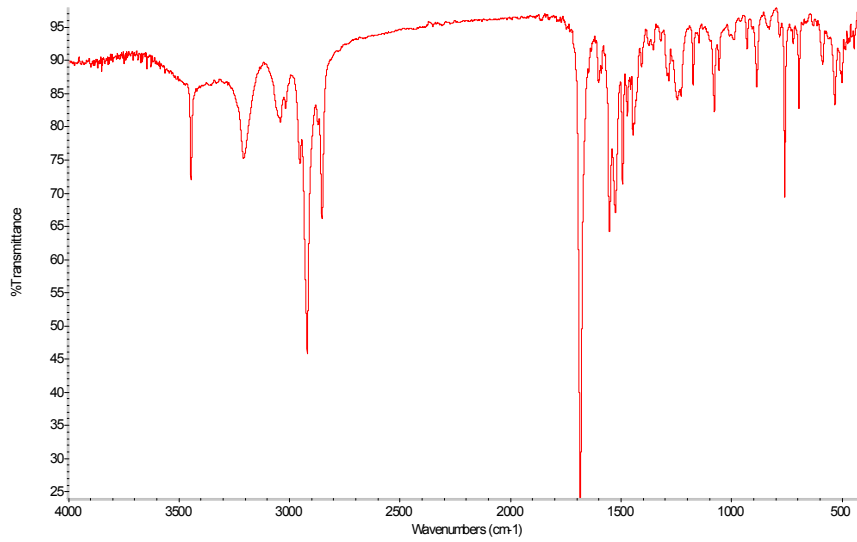

Figure 10 FT-IR of C<sub>12</sub>PDA

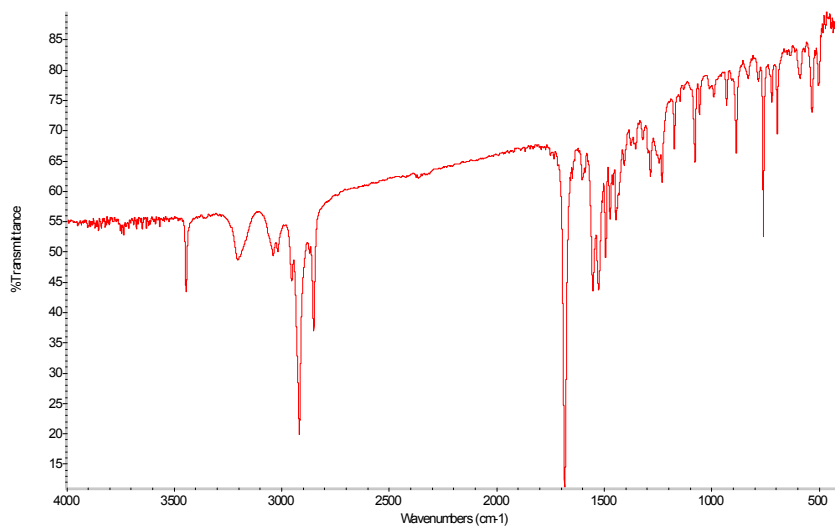

Figure 11 FT-IR of C<sub>14</sub>PDA



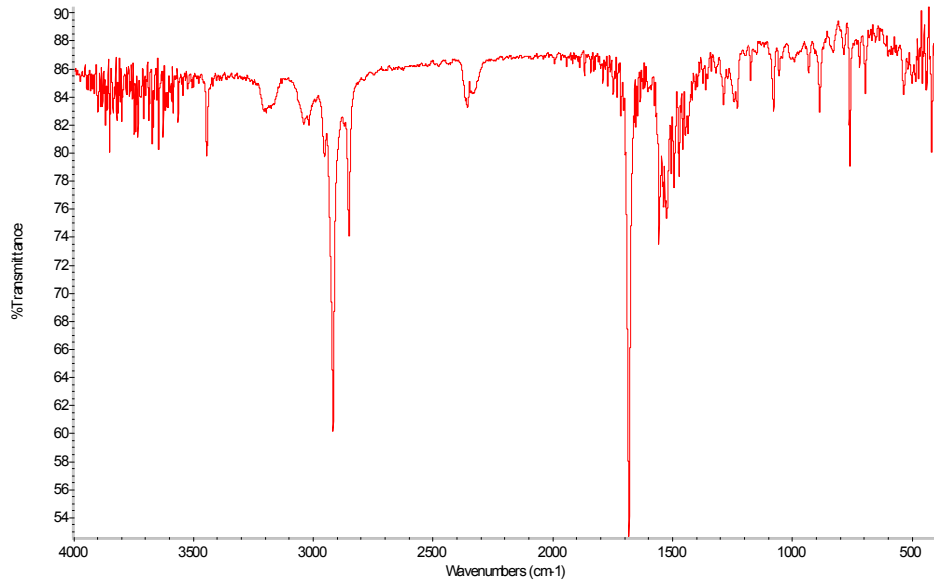

Figure 12 FT-IR of C<sub>16</sub>PDA

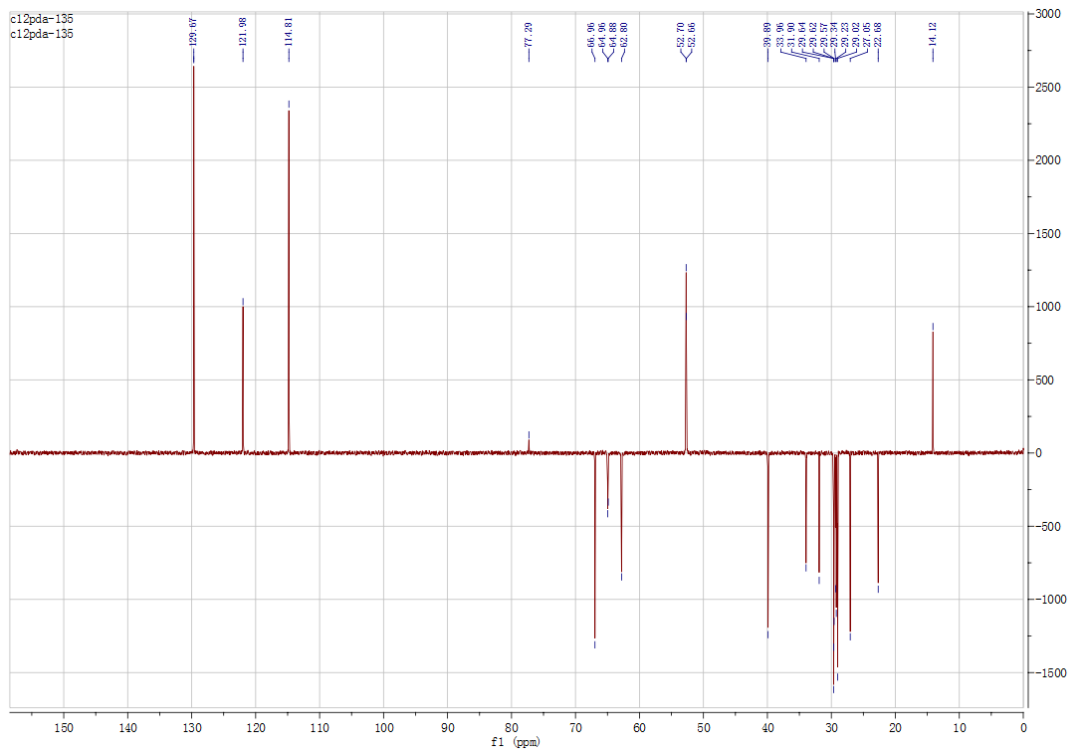

Figure13 <sup>13</sup>C/DEPT spectra of C<sub>12</sub>PDA

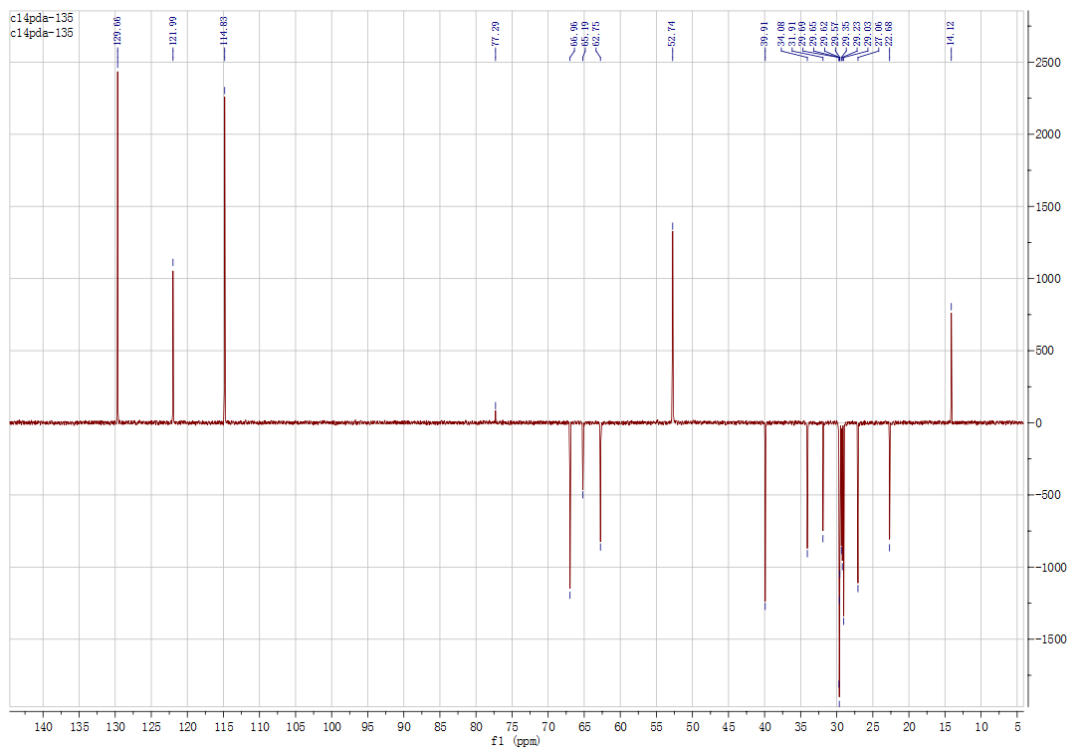

Figure14  $^{13}\text{C}/\text{DEPT}$  spectra of  $\text{C}_{14}\text{PDA}$

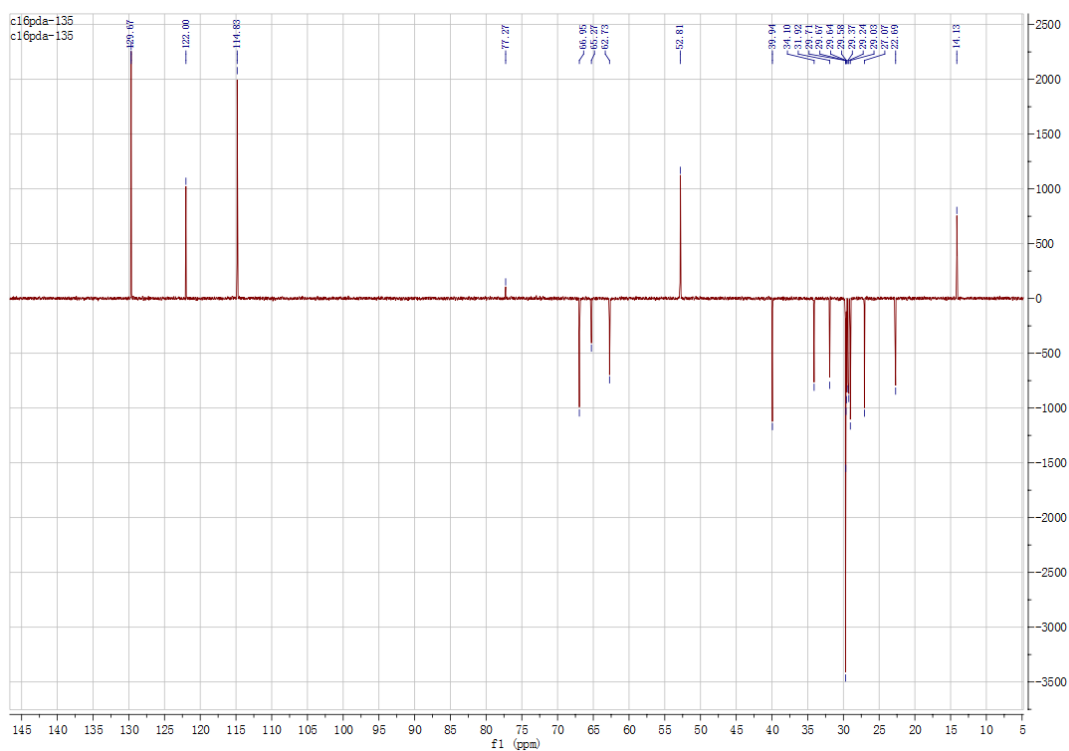

Figure15  $^{13}\text{C}/\text{DEPT}$  spectra of  $\text{C}_{16}\text{PDA}$

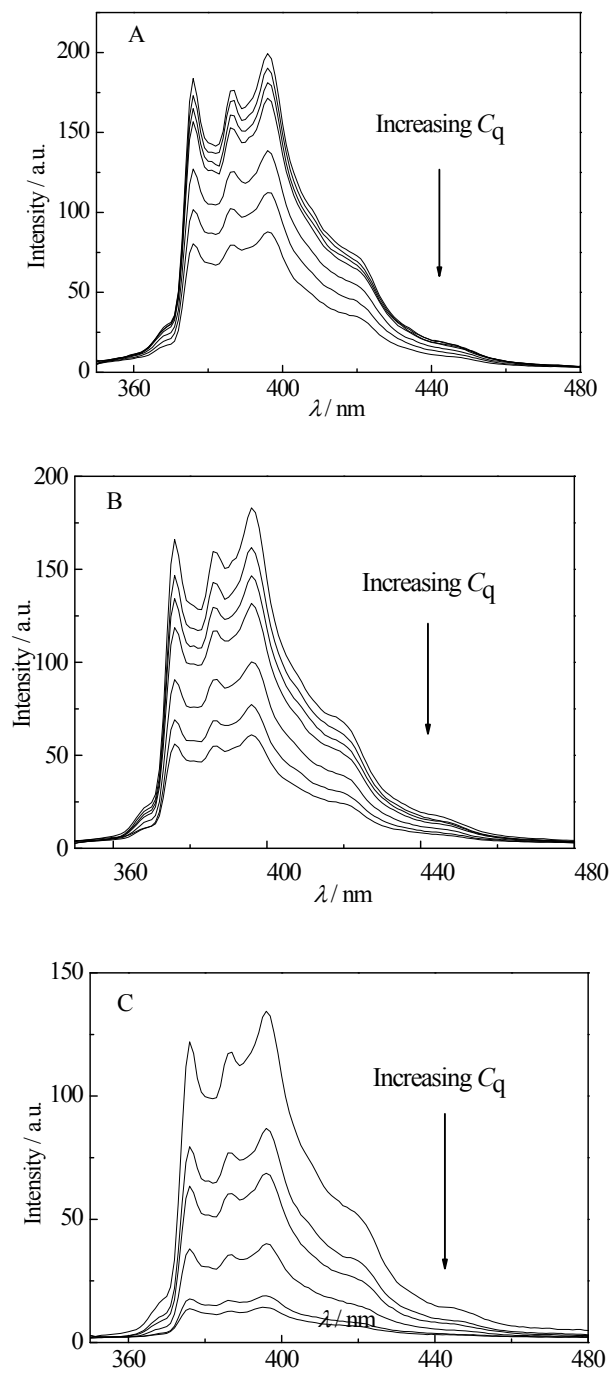

Figure 16 Pyrene emission spectra with the concentration of quencher for C<sub>12</sub>PDA(A), C<sub>14</sub>PDA(B) and C<sub>16</sub>PDA(C).
